# Supplementary material for: Effects of a home-based, exergaming intervention on physical function and pain after total knee replacement in older adults: a randomised controlled trial
Source: HighWire-hosted journal article supplement (doi:10.1136/bmjsem-2022-001416), 2023-03-01
Supplement: bmjsem-2022-001416supp001_data_supplement.pdf [file bmjsem-2022-001416supp001_data_supplement.pdf]

## Supplementary information

Table. Mean (SD) values of Oxford Knee Score (OKS) questionnaire, Timed Up and Go (TUG) test and knee pain intensity in the control and intervention groups at baseline, 2 months and 4 months.

|            | Control<br>N=25<br>Mean (SD) | Intervention<br>N=21<br>Mean (SD) |
|------------|------------------------------|-----------------------------------|
| OKS        |                              |                                   |
| Baseline   | 26.9 (6.5)                   | 26.7 (6.7)                        |
| 2 months   | 30.3 (5.5)                   | 33.4 (6.3)                        |
| 4 months   | 36.7 (6.7)                   | 38.6 (6.1)                        |
| TUG        |                              |                                   |
| Baseline   | 8.3 (1.7)                    | 9.4 (3.6)                         |
| 2 months   | 8.7 (1.6)                    | 8.2 (1.5)                         |
| 4 months   | 7.7 (1.2)                    | 7.6 (1.5)                         |
| Pain (VAS) |                              |                                   |
| Baseline   | 54.2 (21.6)                  | 57.1 (18.3)                       |
| 2 months   | 28.7 (20.0)                  | 30.5 (21.0)                       |
| 4 months   | 27.0 (27.5)                  | 20.8 (20.3)                       |
